# Supplementary material
Source: HighWire-hosted journal article supplement (https://jnm.snmjournals.org/highwire/filestream/95051/field_highwire_adjunct_files/0/180075_Supplemental_Data.pdf)
Supplement: 180075_Supplemental_Data.pdf [file 180075_Supplemental_Data.pdf]

**Supplemental Table 1:** Overview of the included brain metastases

| Metastasis No. | Patient No. | Histology | Pathology     | Diameter <sub>ce</sub> (cm) | VOL <sub>ce</sub> (ml) | TBR <sub>max</sub> | TBR <sub>mean</sub> | BTV (ml) | TTP <sub>min</sub> (minutes) | TAC* | Concurrent Chemotherapy |
|----------------|-------------|-----------|---------------|-----------------------------|------------------------|--------------------|---------------------|----------|------------------------------|------|-------------------------|
| 1              | 1           | Yes       | Lung cancer   | 3.8                         | 21.43                  | 2.87               | 1.82                | 7.68     | 35.0                         | 2    | No                      |
| 2              | 2           | Yes       | Lung cancer   | 3.6                         | 17.77                  | 3.09               | 2.07                | 22.85    | 7.5                          | 4    | No                      |
| 3              | 3           | No        | Lung cancer   | 0.8                         | 0.22                   | 2.46               | 1.89                | 2.11     | 17.5                         | 3    | No                      |
| 4              | 4           | No        | Lung cancer   | 1.6                         | 1.88                   | 2.22               | 1.96                | 1.37     | 25.0                         | 4    | No                      |
| 5              | 5           | No        | Lung cancer   | 1.0                         | 2.25                   | 2.01               | 1.75                | 1.57     | n.a.                         | n.a. | No                      |
| 6              | 6           | Yes       | Lung cancer   | 3.2                         | 19.58                  | 2.00               | 1.70                | 6.26     | 17.5                         | 4    | No                      |
| 7              | 7           | No        | Lung cancer   | 1.8                         | 2.86                   | 3.86               | 2.22                | 9.06     | 12.5                         | 4    | Yes                     |
| 8              | 8           | No        | Lung cancer   | 5.0                         | 35.88                  | 1.88               | 1.68                | 4.58     | 7.5                          | 5    | No                      |
| 9              | 9           | No        | Lung cancer   | 2.2                         | 8.03                   | 2.62               | 1.90                | 4.06     | 25.0                         | 3    | No                      |
| 10             | 9           | No        | Lung cancer   | 0.9                         | 0.40                   | 1.77               | 1.64                | 0.21     | 35.0                         | 1    | No                      |
| 11             | 10          | Yes       | Lung cancer   | 2.7                         | 4.82                   | 2.60               | 1.81                | 6.00     | 47.5                         | 2    | No                      |
| 12             | 11          | Yes       | Lung cancer   | 1.8                         | 3.31                   | 1.64               | 1.67                | 0.06     | 22.5                         | 3    | No                      |
| 13             | 11          | Yes       | Lung cancer   | 6.0                         | 63.10                  | 4.35               | 1.87                | 20.45    | 12.5                         | 3    | No                      |
| 14             | 12          | Yes       | Lung cancer   | 1.9                         | 6.14                   | 3.07               | 1.95                | 6.80     | 25.0                         | 4    | No                      |
| 15             | 13          | Yes       | Lung cancer   | 1.6                         | 1.76                   | 5.10               | 2.67                | 3.91     | 9.5                          | 5    | No                      |
| 16             | 14          | Yes       | Lung cancer   | 2.7                         | 3.83                   | 4.46               | 2.26                | 5.65     | 15.5                         | 5    | No                      |
| 17             | 15          | Yes       | Breast cancer | 2.4                         | 3.69                   | 2.94               | 2.13                | 0.67     | 27.5                         | 3    | No                      |
| 18             | 16          | No        | Breast cancer | 2.4                         | 7.75                   | 3.11               | 2.19                | 12.25    | 12.5                         | 5    | No                      |
| 19             | 17          | No        | Breast cancer | 1.6                         | 9.08                   | 2.99               | 1.97                | 23.98    | 12.5                         | 2    | Yes                     |

|    |    |     |               |     |       |      |      |       |      |      |     |
|----|----|-----|---------------|-----|-------|------|------|-------|------|------|-----|
| 20 | 17 | No  | Breast cancer | 0.7 | 0.27  | 1.50 | 1.22 | n.e.  | n.e. | n.e. | Yes |
| 21 | 18 | Yes | Breast cancer | 0.8 | 0.22  | 2.12 | 1.79 | 0.36  | 35.0 | 3    | No  |
| 22 | 19 | Yes | Melanoma      | 2.7 | 6.20  | 2.06 | 1.72 | 4.14  | 12.5 | 5    | No  |
| 23 | 20 | Yes | Melanoma      | 2.8 | 10.01 | 9.47 | 3.71 | 10.95 | 35.0 | 1    | No  |
| 24 | 20 | Yes | Melanoma      | 1.2 | 0.97  | 2.71 | 1.97 | 1.01  | 35.0 | 1    | No  |
| 25 | 20 | Yes | Melanoma      | 0.6 | 0.14  | 7.35 | 5.48 | 1.35  | 35.0 | 1    | No  |
| 26 | 21 | Yes | Melanoma      | 2.9 | 5.08  | 2.28 | 1.73 | 3.27  | 35.0 | 1    | No  |
| 27 | 21 | Yes | Melanoma      | 2.2 | 6.72  | 2.75 | 2.07 | 5.24  | 35.0 | 1    | No  |
| 28 | 22 | Yes | Melanoma      | 2.6 | 6.71  | 3.78 | 2.19 | 4.40  | 12.5 | 4    | Yes |
| 29 | 22 | Yes | Melanoma      | 2.6 | 8.10  | 4.39 | 2.32 | 4.90  | 12.5 | 5    | Yes |
| 30 | 22 | Yes | Melanoma      | 0.8 | 0.05  | 1.36 | 1.05 | n.e.  | n.e. | n.e. | Yes |
| 31 | 22 | Yes | Melanoma      | 0.9 | 0.22  | 1.79 | 1.68 | 0.14  | 25.0 | 3    | Yes |
| 32 | 22 | Yes | Melanoma      | 1.5 | 1.42  | 2.45 | 1.84 | 4.03  | 7.5  | 5    | Yes |
| 33 | 22 | Yes | Melanoma      | 0.7 | 0.18  | 1.34 | 1.02 | n.e.  | n.e. | n.e. | Yes |
| 34 | 23 | No  | Melanoma      | 1.0 | 0.93  | 1.27 | 1.48 | n.e.  | n.e. | n.e. | No  |
| 35 | 23 | No  | Melanoma      | 0.7 | 0.65  | 2.12 | 1.82 | 0.55  | 17.5 | 3    | No  |
| 36 | 23 | No  | Melanoma      | 2.7 | 5.41  | 1.75 | 1.66 | 0.22  | 17.5 | 3    | No  |
| 37 | 24 | Yes | Melanoma      | 1.0 | 0.28  | 1.93 | 1.72 | 0.15  | 25.0 | 3    | No  |
| 38 | 25 | No  | Melanoma      | 2.2 | 4.31  | 1.66 | 1.63 | 0.04  | 25.0 | 3    | No  |
| 39 | 25 | No  | Melanoma      | 0.9 | 0.13  | 1.25 | 1.07 | n.e.  | n.e. | n.e. | No  |
| 40 | 25 | No  | Melanoma      | 1.2 | 1.48  | 1.66 | 1.63 | 0.09  | 35.0 | 1    | No  |
| 41 | 26 | Yes | Melanoma      | 5.0 | 15.95 | 1.91 | 1.71 | 1.15  | 25.0 | 2    | No  |
| 42 | 27 | No  | Melanoma      | 0.9 | 0.19  | 1.94 | 1.73 | 0.30  | 35.0 | 1    | Yes |

|    |    |     |               |     |      |      |      |      |      |   |     |
|----|----|-----|---------------|-----|------|------|------|------|------|---|-----|
| 43 | 28 | Yes | Melanoma      | 1.7 | 1.65 | 4.31 | 2.52 | 2.06 | 12.5 | 5 | No  |
| 44 | 29 | Yes | Ewing Sarcoma | 1.7 | 1.19 | 4.01 | 2.31 | 5.62 | 4.5  | 5 | Yes |
| 45 | 30 | Yes | CUP           | 3.0 | 7.63 | 1.80 | 1.66 | 0.48 | 17.5 | 4 | No  |

N.a. = not available; n.e. = not evaluable; CUP = cancer of unknown primary;

TAC\*: 1 = increasing, 2 = mainly increasing, 3 = mixed patterns, 4 = mainly decreasing, 5 = decreasing.
